# Supplementary material for: Effects of tropical fruit blends on fermentative and pigmentation aspects of probiotic native cultured goat milk
Source: PeerJ. 2025 Jan 13;13:e18813. doi: 10.7717/peerj.18813 (PMC11737326; doi:10.7717/peerj.18813)
Supplement: Supplemental Information 1 — The experimental planning carried out taking into account the phenolic content and color, in addition to the viability data of Lactobacillaceae, pH and acidity, Streptococus thermopilus and the color parameters: L, a, b, HUE and phenolic content of the fruit preparations. [file peerj-13-18813-s001.xlsx]

## Sheet: Experimental Design_x0009__x0009__x0009__x0009__x0009__x0009_
Experimental Design
TRIAL	REPLICATE	PHENOLICS	COLOR a*	L. plantarum	X1	X2	X3
1	1	227.561	7.3	9.6464	1	0	0
1	2	223.322	7.45	8.47721	1	0	0
1	3	223.625	7.4	8.89416	1	0	0
2	1	46.0553	4.85	9.28563	0	1	0
2	2	46.3652	4.81	9.39377	0	1	0
2	3	47.6049	4.77	8.25329	0	1	0
3	1	35.4228	0.2	8.2249	0	0	1
3	2	37.3444	0.09	9.79989	0	0	1
3	3	39.5862	0.13	9.68055	0	0	1
4	1	137.602	5.48	9.1735	0.5	0.5	0
4	2	147.35	5.29	8.95442	0.5	0.5	0
4	3	153.639	5.33	8.69696	0.5	0.5	0
5	1	81.1981	5	8.2123	0.5	0	0.5
5	2	99.8927	4.91	9.76292	0.5	0	0.5
5	3	89.2991	5.07	8.26775	0.5	0	0.5
6	1	22.1832	3.8	9.42159	0	0.5	0.5
6	2	23.3888	3.89	7.92387	0	0.5	0.5
6	3	21.5805	3.86	9.22293	0	0.5	0.5
7	1	79.3316	6.15	8.3692	0.333333	0.333333	0.333333
7	2	77.8269	6.22	8.59566	0.333333	0.333333	0.333333
7	3	75.7711	6.15	8.05315	0.333333	0.333333	0.333333
ANOVA; Var.:L. plantarum 3 Factor mixture design; Mixture total=1,, 21 Runs Sequential fit of models of increasing complexity
Model	df	MS	SS	df	MS	F	p	R-Sqr	R-Sqr
	Effect	Effect	Error	Error	Error				Adjusted
Linear	2	0.0244838	7.51293	18	0.417385	0.0586599	0.943207	0.00647556	0
Quadratic	3	0.333139	6.51351	15	0.434234	0.767188	0.530019	0.13864	0
Special Cubic	1	0.347276	6.16623	14	0.440445	0.788467	0.389565	0.184565	0
Total Adjusted	20	0.378095
ANOVA; Var.:Phenolic 3 Factor mixture design; Mixture total=1,, 21 Runs Sequential fit of models of increasing complexity
Model	df	MS	SS	df	MS	F	p	R-Sqr	R-Sqr
	Effect	Effect	Error	Error	Error				Adjusted
Linear	2	43396.9	5546.69	18	308.15	140.831	1.01807e-11	0.939932	0.933258
Quadratic	3	1731.45	352.341	15	23.4894	73.712	3.313e-09	0.996184	0.994912
Total Adjusted	20	4617.03
Overall Fit of Model; Var.: Phenolic 3 Factor mixture design; Mixture total=1,, 21 Runs
Source	SS	df	MS	F	p
Model	91988.2	5	18397.6	783.231	1.40772e-17
Total Error	352.341	15	23.4894
Lack of Fit	16.6838	1	16.6838	0.695868	0.418182
Pure Error	335.657	14	23.9755
Total Adjusted	92340.5	20	4617.03
Coeffs (recoded comps); Var.:Phenolic; R-sqr=,9962; Adj:,9949 3 Factor mixture design; Mixture total=1,, 21 Runs DV: PHENOLICS; MS Residual=23,4894
Factor	Coeff.	Std.Err.	t(15)	p	-95,%	+95,%
					Cnf.Limt	Cnf.Limt
(A)X1	225.041	2.78756	80.7305	3.27142e-21	219.099	230.982
(B)X2	46.8804	2.78756	16.8177	3.8229e-11	40.9389	52.8219
(C)X3	37.6564	2.78756	13.5087	8.43148e-10	31.7148	43.5979
AB	37.6618	12.8136	2.9392	0.0101538	10.3502	64.9733
AC	-168.159	12.8136	-13.1235	1.26051e-09	-195.47	-140.847
BC	-82.821	12.8136	-6.46352	1.06877e-05	-110.133	-55.5094
ANOVA; Var.:color a* 3 Factor mixture design; Mixture total=1,, 21 Runs Sequential fit of models of increasing complexity
Model	df	MS	SS	df	MS	F	p	R-Sqr	R-Sqr
	Effect	Effect	Error	Error	Error				Adjusted
Linear	2	39.002	16.3322	18	0.907343	42.9848	1.39731e-07	0.826873	0.807636
Quadratic	3	4.49799	2.8382	15	0.189213	23.7721	5.95119e-06	0.969914	0.959885
Special Cubic	1	2.77673	0.0614667	14	0.00439048	632.444	4.72565e-13	0.999348	0.999069
Total Adjusted	94.3361	20	4.7168
Overall Fit of Model; Var.: color a* 3 Factor mixture design; Mixture total=1,, 21 Runs
Source	SS	df	MS	F	p
Model	94.2746	6	15.7124	3578.75	1.79283e-21
Total Error	0.0614667	14	0.00439048
Lack of Fit	4.95368e-14	0	0
Pure Error	0.0614667	14	0.00439048
Total Adjusted	94.3361	20	4.7168
Coeffs (recoded comps); Var.:Cor; R-sqr=,9993; Adj:,9991 3 Factor mixture design; Mixture total=1,, 21 Runs DV: Cor ; MS Residual=0.0043905
Factor	Coeff.	Std.Err.	t(15)	p	-95,%	+95,%
					Cnf.Limt	Cnf.Limt
(A)X1	7.38333	0.0382556	193	2.21386e-25	7.30128	7.46538
(B)X2	4.81	0.0382556	125.733	8.89615e-23	4.72795	4.89205
(C)X3	0.14	0.0382556	3.65959	0.00257542	0.0579499	0.22205
AB	-2.92	0.187413	-15.5805	3.07638e-10	-3.32196	-2.51804
AC	4.92667	0.187413	26.2877	2.57231e-13	4.5247	5.32863
BC	5.5	0.187413	29.3469	5.65194e-14	5.09804	5.90196
ABC	33.16	1.31857	25.1484	4.72565e-13	30.3319	35.9881
Spearman Rank Order Correlations MD pairwise deleted Marked correlations are significant at p <,05000
Variable	PHENOLICS	COLOR
PHENOLICS	1	0.834037
COLOR	0.834037	1

## Sheet: pH, acidity, phenolic...
PHENOLICS OF FRUIT PREPARATIONS
FRUIT PREPARATIONS	REPLICATE	PHENOLICS
JABOTICABA	1	438.795
	2	392.572
	3	472.637
JAMBOLANA	1	143.304
	2	158.584
	3	173.865
MANDACARU	1	112.252
	2	119.606
	3	114.311
FERMENTED MILK DATA
TRIAL	REPLICATE	pH T0	pH T6	ACIDITY T0	ACIDITY T6	PHENOLIC	L. plantarum T0	L. plantarum T6	S. thermophilus T0	S. thermophilus T6	L* (LUMINOSITY)	COLOR a*	COLOR b*	C* (CHROMA)	HUE ANGLE (h°)
T1	1	5.08	4.67	0.290819	0.604444	227.561	7.81762	9.6464	7.78675	8.46584	20.85	7.3	-2.69	7.77985	339.772
T1	2	5.03	4.6	0.289869	0.605619	223.322	7.87721	8.47721	7.85824	8.80826	20.74	7.45	-2.72	7.93101	339.943
T1	3	5.02	4.7	0.280107	0.604761	223.625	7.81011	8.89416	7.8621	8.94296	20.71	7.4	-2.72	7.88406	339.818
T2	1	5.91	4.66	0.257748	0.608791	46.0553	7.83942	9.28563	7.95204	8.80224	25.49	4.85	-3.63	6.058	323.187
T2	2	5.8	4.66	0.24262	0.597965	46.3652	7.83535	9.39377	7.81119	8.70624	25.65	4.81	-3.73	6.08679	322.208
T2	3	5.85	4.6	0.247168	0.596921	47.6049	7.81011	8.25329	7.78675	8.62127	25.81	4.77	-3.66	6.01236	322.501
T3	1	6.37	4.63	0.242687	0.645799	35.4228	7.6118	8.2249	7.79242	8.77856	26.14	0.2	2.61	2.61765	85.6181
T3	2	6.35	4.55	0.244646	0.687934	37.3444	7.67972	9.79989	7.79691	8.66996	26.29	0.09	2.69	2.69151	88.0838
T3	3	6.3	4.57	0.258051	0.594334	39.5862	7.73844	9.68055	7.81011	8.62127	26.21	0.13	2.57	2.57329	87.1042
T4	1	5.41	4.73	0.275479	0.606509	137.602	7.6135	9.1735	7.55136	8.99964	20.23	5.48	-1.96	5.81997	340.32
T4	2	5.4	4.66	0.262267	0.604238	147.35	7.57058	8.95442	7.74979	8.60054	20.12	5.29	-1.83	5.59759	340.918
T4	3	5.34	4.63	0.271142	0.603877	153.639	7.59078	8.69696	7.86114	8.9332	20.01	5.33	-1.97	5.68241	339.715
T5	1	5.86	4.7	0.30923	0.601728	81.1981	7.77984	8.2123	7.46464	8.56222	21	4.49	-1.27	4.66615	344.206
T5	2	5.84	4.67	0.291835	0.606219	99.8927	7.73716	9.76292	7.86114	8.89181	21.32	4.91	-1.34	5.08957	344.735
T5	3	5.8	4.7	0.283703	0.604936	89.2991	7.75227	8.26775	7.66936	8.63217	21.32	5.07	-1.4	5.25974	344.563
T6	1	6.31	4.54	0.245374	0.603536	22.1832	7.5979	9.42159	7.72151	8.76157	28.19	3.8	0.64	3.85352	9.5601
T6	2	6.42	4.56	0.236379	0.603181	23.3888	7.9296	7.92387	7.95593	8.94384	28.28	3.89	0.57	3.93154	8.3362
T6	3	6.35	4.55	0.243426	0.57808	21.5805	7.73972	9.22293	7.79129	8.76157	28.36	3.86	0.53	3.89622	7.81815
T7	1	5.75	4.68	0.266588	0.60466	79.3316	7.54939	8.3692	7.75963	8.83942	31.54	6.15	-1.18	6.26218	349.139
T7	2	5.7	4.69	0.253689	0.602867	77.8269	7.58898	8.59566	7.83942	8.46054	31.64	6.22	-1.28	6.35034	348.372
T7	3	5.75	4.6	0.25834	0.577564	75.7711	7.5979	8.05315	7.85042	8.24399	31.65	6.15	-1.16	6.25844	349.318
T8	1	6.71	4.54	0.243764	0.593696	7.66918	7.51446	7.89181	7.60142	8.66666	35.84	-0.27	2.74	2.75327	95.6278
T8	2	6.68	4.57	0.246936	0.640506	6.73409	7.56299	8.40672	7.61008	8.66996	35.74	-0.24	2.74	2.75049	95.0058
T8	3	6.7	4.57	0.246475	0.602178	7.35749	7.57058	7.7206	7.62857	8.72548	35.71	-0.24	2.7	2.71065	95.0796
